# Supplementary material for: Lipase immobilised on silica monoliths as continuous-flow microreactors for triglyceride transesterification
Source: Royal Society of Chemistry journal article supplement (doi:10.1039/c7re00162b), 2017-12-18
Supplement: c7re00162b1.pdf [file c7re00162b1.pdf]

## Lipase immobilised silica monoliths as continuous-flow microreactors for triglyceride transesterification

Mohammed Alotaibi<sup>a,b</sup>, Jinesh C. Manayil<sup>b</sup>, Gillian M Greenway<sup>a</sup>, Stephen J. Haswell<sup>a</sup>, Stephen M. Kelly, Adam F. Lee<sup>d\*</sup>, Karen Wilson<sup>d</sup> and Georgios Kyriakou<sup>a,b,c\*</sup>

<sup>a</sup>Department of Chemistry, The University of Hull, Cottingham Rd., Hull HU6 7RX, United Kingdom.

<sup>b</sup>European Bioenergy Research Institute, Aston University, Aston Triangle, Birmingham B4 7ET, United Kingdom

<sup>c</sup>Chemical Engineering and Applied Chemistry, Aston University, Aston Triangle, Birmingham B4 7ET, United Kingdom.

<sup>d</sup>School of Science, RMIT University, Melbourne VIC3000, Australia

### Characterisation

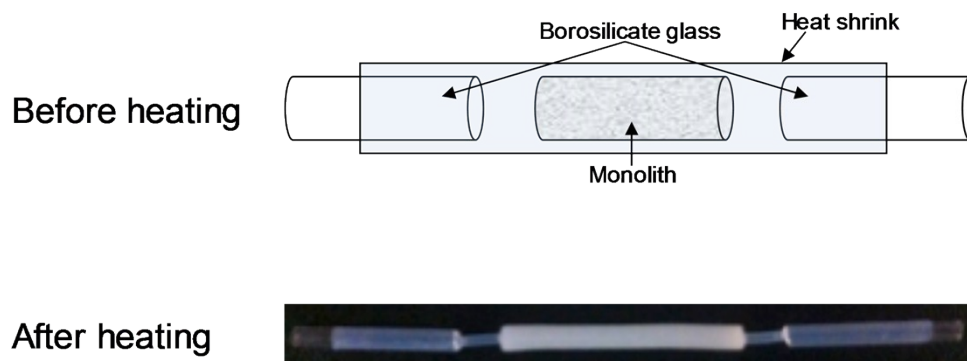

**Fig. S1.** Interfacing of monolithic microreactor to borosilicate glass tubes using PTFE heat shrinkable tubing.

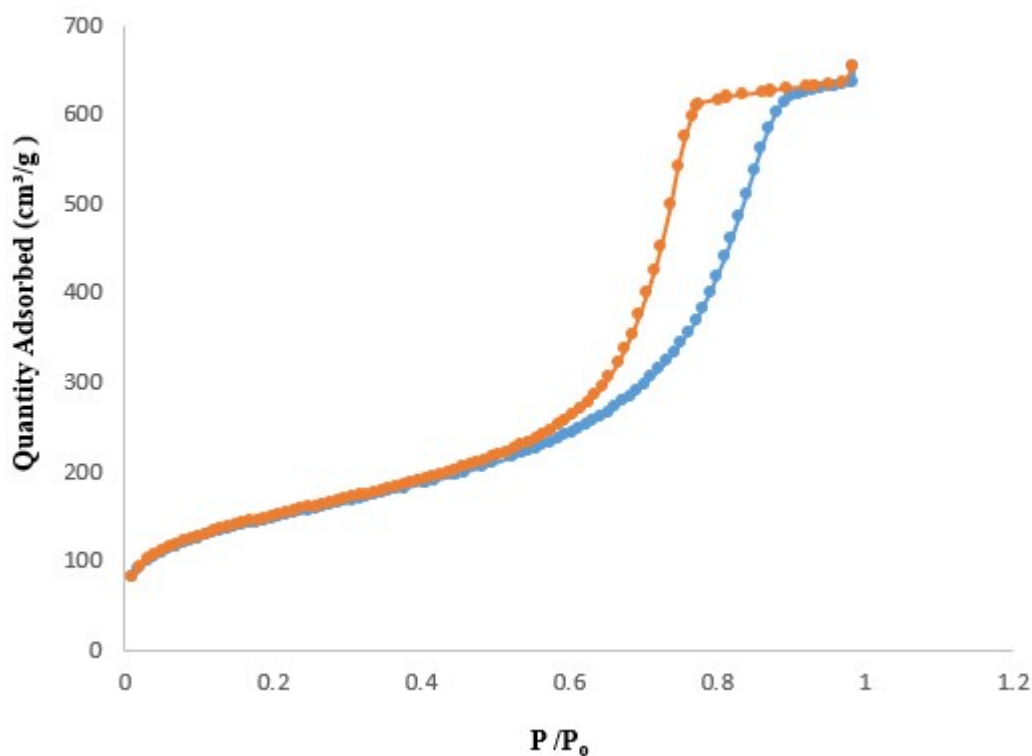

**Fig. S2** Nitrogen adsorption-desorption isotherm for M1.

## Reactivity

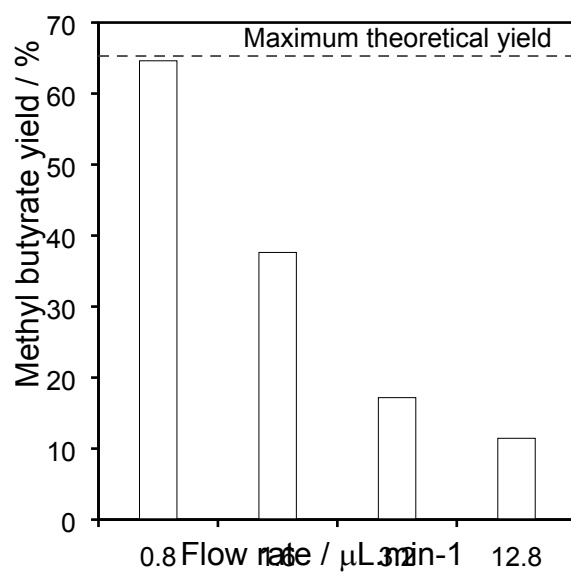

**Fig. S3** Methyl butyrate yield over M2 catalyst as a function of flow rate. Reaction conditions: methanol:tributylin molar ratio = 2:1, 30 °C and 20 h on-stream.

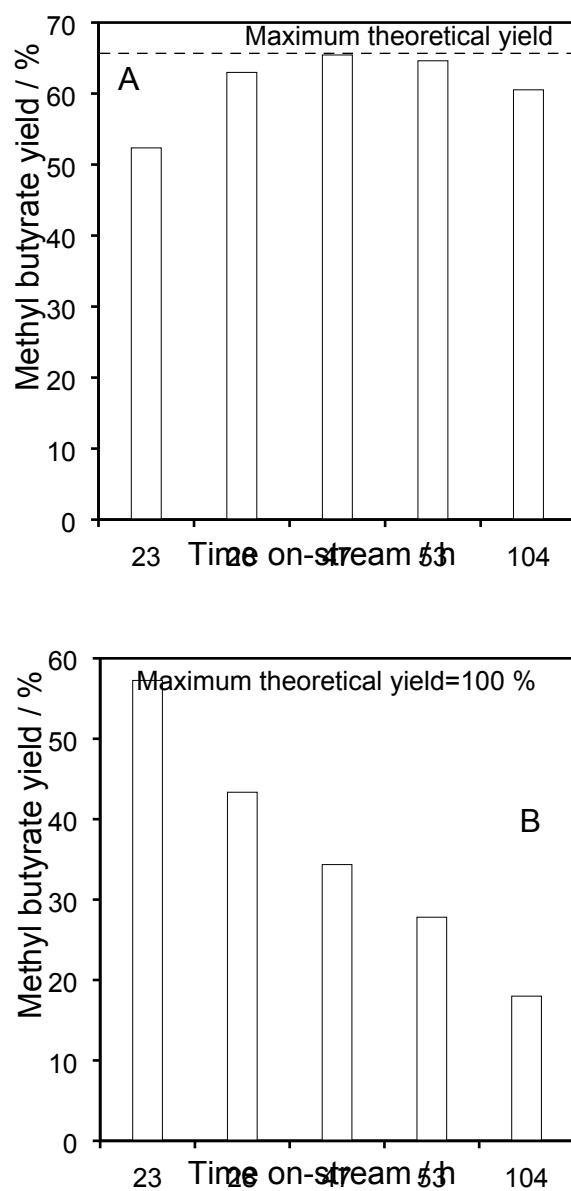

**Fig. S4** Methyl butyrate yield over M2 catalyst as a function of time on-stream for (A) 2:1 and (B) 3:1 methanol: tributyrin molar ratio. Reaction conditions: 0.8  $\mu\text{L} \cdot \text{min}^{-1}$  and 30 °C.

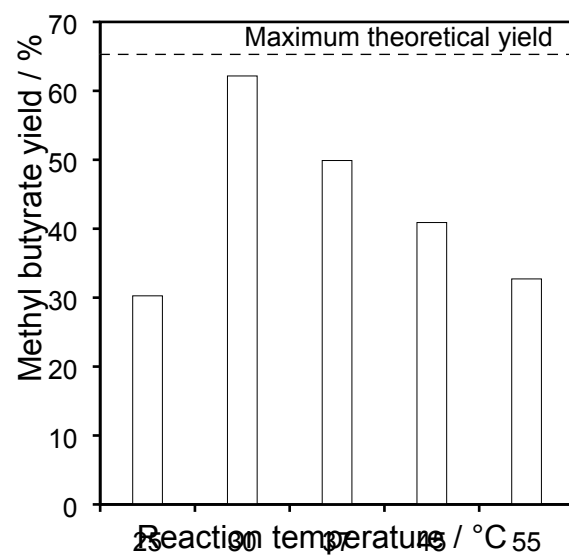

**Fig. S5** Methyl butyrate yield over M2 catalyst as a function of reaction temperature. Reaction conditions: 0.8  $\mu\text{L} \cdot \text{min}^{-1}$ , methanol:tributyrin molar ratio = 2:1 and 20 h on-stream
